6. Tuttle WW, Elliott HW: Electrographic and behavioral study of convulsants in the cat. *ANESTHESIOLOGY* 30:48-64, 1969
7. Tuttle WW, Riblet LA: Investigation of the amygdaloid and olfactory electrographic response in the cat after toxic dosage of lidocaine. *Electroenceph Clin Neurophysiol* 28: 601-608, 1970
8. Wagman IH, de Jong RH, Prince DA: Effects of lidocaine on spontaneous cortical and subcortical electrical activity: Production of seizure discharges. *Arch Neurol* 18:277-290, 1968
9. Eidelberg E, Neer HM, Miller MK: Anticonvulsant properties of some benzodiazepine derivatives. Possible use against psychomotor seizures. *Neurology* 15:223-230, 1965
10. Litchfield JT, Wilcoxon F: A simplified method of evaluating dose-effect experiments. *J Pharmacol Exp Ther* 96:99-113, 1949
11. Morillo A: Effects of benzodiazepines upon amygdala and hippocampus of the cat. *Int J Neuropharmacol* 1: 353-359, 1962
12. Ngai SH, Tseng DTC, Wang SC: Effect of diazepam and other central nervous system depressants on spinal reflexes in cats: A study of site of action. *J Pharmacol Exp Ther* 153:344-351, 1966
13. Przybyla AC, Wang SC: Locus of central depressant action of diazepam. *J Pharmacol Exp Ther* 163:439-447, 1968
14. Schallek W, Zabransky F, Kuchin A: Effects of benzodiazepines on central nervous system of cat. *Arch Int Pharmacodyn* 149:467-483, 1964
15. Swinyard EA, Castellion AW: Anticonvulsant properties of some benzodiazepines. *J Pharmacol Exp Ther* 151:369-375, 1966
16. Feinstein MB, Lenard W, Mathias J: The antagonism of local anesthetic induced convulsions by the benzodiazepine derivative diazepam. *Arch Int Pharmacodyn* 187:144-154, 1970
17. Munson ES, Wagman IH: Acid-base changes during lidocaine induced seizures in Macaca mulatta. *Arch Neurol* 20:406-412, 1969
18. Delgado JMR, Johnston VS, Wallace JD, Bradley RJ: Operant conditioning of amygdala spindling in the free chimpanzee. *Brain Res* 22:347-362, 1970
19. de Jong RH, Walts LF: Lidocaine-induced psychomotor seizures in man. *Acta Anaesth Scand* 23:598-604, 1966
20. Neidermeyer E: Electroencephalographic studies on the anticonvulsive action of intravenous diazepam. *Europ Neurol* 3:88-96, 1970
21. Dundee JW, Haslett WHK: The benzodiazepines. A review of their action and uses relative to anaesthetic practice. *Brit J Anaesth* 42:217-234, 1970

---

### Drugs

**RECOVERY FROM CURARE** The major hazard to the use of curare-like drugs in anesthesia is the failure to antagonize residual muscle weakness. The head-raising test is not always a reliable index of recovery from neuromuscular blockade. On the other hand, a sustained contraction in response to tetanic nerve stimulation could always be correlated with greater than 90 per cent recovery in vital capacity and maximum voluntary ventilation. In the event a patient cannot maintain a tetanic contracture of muscle during nerve stimulation, the residual effects from the administration of curare should be treated with an anticholinesterase drug. (Walts, L. F., and others: *Assessment of Recovery from Curare*, J.A.M.A. 213: 1894 (Sept.) 1970.)

**SUCCINYLCHOLINE** The dangerously high levels of plasma potassium known to follow administration of succinylcholine chloride in patients with burns or trauma have also been noted in patients with paraplegia or hemiplegia, muscular dystrophy, and multiple sclerosis. Of 40 patients with these neuromuscular diseases, 15 had increases in potassium levels of between 1 and 6 mEq/l after receiving succinylcholine chloride, 1 mg/kg body weight. Most increases greater than 1 mEq/l occurred in patients who had been ill for less than six months or, if longer, who had progressive diseases. The degree and extent of muscle paralysis seemed to correlate directly with the relaxant-induced hyperkalemia. (Cooperman, L. H.: *Succinylcholine-induced Hyperkalemia in Neuromuscular Disease*, J.A.M.A. 213: 1867 (Sept.) 1970.)
